# Supplementary material for: Preparation and characterization of various PVPylated divalent metal-doped ferrite nanoparticles for magnetic hyperthermia
Source: Royal Society of Chemistry journal article supplement (doi:10.1039/d4ra01600a), 2024-01-01
Supplement: d4ra01600a1.pdf [file d4ra01600a1.pdf]

## Supplementary Information

### Preparation and characterization of various PVPylated divalent metal-doped ferrite nanoparticles for magnetic hyperthermia

Kheireddine El-Boubbou,<sup>1\*</sup> O. M. Lemine,<sup>2</sup> Saja Algessair,<sup>2</sup> Nawal Madkhali,<sup>2</sup> Basma Al-Najar,<sup>3</sup> Enas AlMatri,<sup>1</sup> Rizwan Ali,<sup>4</sup> and Mohamed Henini<sup>5</sup>

<sup>1</sup>Department of Chemistry, College of Science, University of Bahrain, Sakhir 32038, Bahrain

<sup>2</sup>Department of Physics, College of Science, Imam Mohammad Ibn Saud Islamic University (IMISU), Riyadh 11623, Saudi Arabia

<sup>3</sup>Department of Physics, College of Science, University of Bahrain, Sakhir 32038, Bahrain

<sup>4</sup>Medical Research Core Facility and Platforms (MRCFP), King Abdullah International Medical Research Center/King Saud bin Abdulaziz University for Health Sciences (KSAU-HS), King Abdulaziz Medical City (KAMC), NGH, Riyadh, Saudi Arabia

<sup>5</sup>School of Physics and Astronomy, University of Nottingham, Nottingham, NG7 2RD, United Kingdom

\*Corresponding authors: Kheireddine El-Boubbou and O.M.Lemine (E-mail: [khboubbou@uob.edu.bh](mailto:khboubbou@uob.edu.bh); Tel: +973 17437506; [mamamin@imamu.edu.sa](mailto:mamamin@imamu.edu.sa); Tel: +966112594627)

## 1. Effect of increasing metal doping:

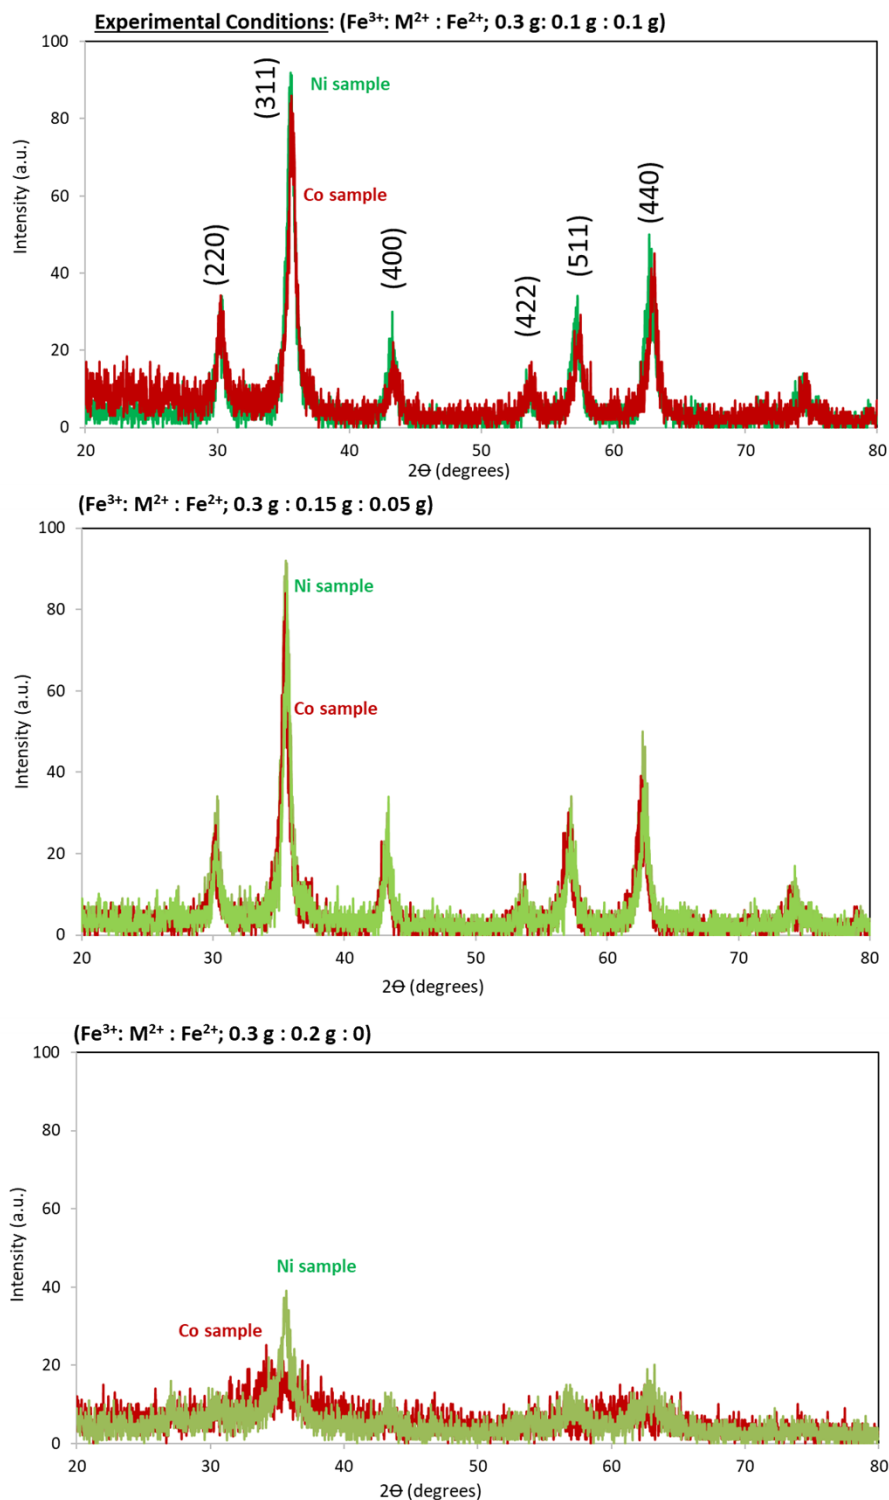

**Figure S1.** Effect of metal doping on the ferrite phase. It can be clearly seen that no difference is observed when concentration of  $\text{Ni}^{2+}$  or  $\text{Co}^{2+}$  was increased from 0.1 to 0.15 g in the presence of  $\text{Fe}^{2+}$ , however absence of  $\text{Fe}^{2+}$  will distort the crystalline phase.

## 2. Rietveld analysis:

**Table S1. Rietveld analysis results of XRD patterns of PVP-capped MFe<sub>2</sub>O<sub>4</sub> NPs.**

| Sample<br>(Phase %)                                              | DB card<br>No.  | Size<br>(nm) | Micro<br>strain | Lattice<br>Parameter<br>(Å°)  | Fitting Parameters |       |     |       |     |       |
|------------------------------------------------------------------|-----------------|--------------|-----------------|-------------------------------|--------------------|-------|-----|-------|-----|-------|
|                                                                  |                 |              |                 |                               | Rwp:               |       | Rp: |       | Re: |       |
| PVP-Fe <sub>3</sub> O <sub>4</sub><br>(100 %)                    | 01-071-6337     | 9            | 0.314<br>(7)    | a:8.344<br>b:8.344<br>c:8.344 | Rwp:               | 41.4  | Rp: | 31.06 | Re: | 37.85 |
|                                                                  |                 |              |                 |                               | S:                 | 1.09  | X2  | 1.19  |     |       |
|                                                                  |                 |              |                 |                               |                    |       |     |       |     |       |
| PVP-NiFe <sub>2</sub> O <sub>4</sub><br>(100 %)                  | 01-071-3850     | 18.5         | 0.093<br>(6)    | a:8.355<br>b:8.355<br>c:8.355 | Rwp:               | 38.58 | Rp: | 27.38 | Re: | 36.92 |
|                                                                  |                 |              |                 |                               | S:                 | 1.044 | X2  | 1.09  |     |       |
|                                                                  |                 |              |                 |                               |                    |       |     |       |     |       |
| PVP-CoFe <sub>2</sub> O <sub>4</sub><br>(100 %)                  | 01-074-<br>6402 | 9.3          | 0.09<br>(7)     | a:8.379<br>b:8.379<br>c:8.379 | Rwp:               | 41.29 | Rp: | 30.42 | Re: | 41.61 |
|                                                                  |                 |              |                 |                               | S:                 | 0.992 | X2  | 0.983 |     |       |
|                                                                  |                 |              |                 |                               |                    |       |     |       |     |       |
| PVP-ZnFe <sub>2</sub> O <sub>4</sub><br>(100 %)                  | 01-071-5149     | 8.9          | 0.343<br>(12)   | a:8.436<br>b:8.436<br>c:8.436 | Rwp:               | 24.11 | Rp: | 16.76 | Re: | 22.91 |
|                                                                  |                 |              |                 |                               | S:                 | 1.05  | X2  | 1.1   |     |       |
|                                                                  |                 |              |                 |                               |                    |       |     |       |     |       |
| PVP-MgFe <sub>2</sub> O <sub>4</sub><br>(100 %)                  | 01-071-4919     | 5.2          | 1.13<br>(4)     | a:8.355<br>b:8.355<br>c:8.355 | Rwp:               | 29.68 | Rp: | 22.84 | Re: | 27.24 |
|                                                                  |                 |              |                 |                               | S:                 | 1.08  | X2  | 1.18  |     |       |
|                                                                  |                 |              |                 |                               |                    |       |     |       |     |       |
| PVP-Sn <sub>0.5</sub> Fe <sub>2.5</sub> O <sub>4</sub><br>(100%) | 01-071-0695     | 10.7         | 0.59<br>(13)    | a:8.642<br>b:8.642<br>c:8.642 | Rwp:               | 31.2  | Rp: | 31.95 | Re: | 19.66 |
|                                                                  |                 |              |                 |                               | S:                 | 1.58  | X2  | 2.5   |     |       |
|                                                                  |                 |              |                 |                               |                    |       |     |       |     |       |

### 3. Elemental analysis:

Tables S2. SEM-EDX elemental composition of the different PVP-capped  $MFe_2O_4$  doped ferrites.

#### PVP- $Fe_3O_4$

| Element | Weight % | Atomic % |
|---------|----------|----------|
| C       | 2.80     | 7.50     |
| O       | 25.4     | 51.2     |
| Fe      | 71.8     | 41.3     |

#### PVP- $CoFe_2O_4$

| Element | Weight % | Atomic % |
|---------|----------|----------|
| C       | 3.7      | 9.25     |
| O       | 29.7     | 55.7     |
| Fe      | 42.7     | 22.95    |
| Co      | 23.9     | 12.1     |

#### PVP- $NiFe_2O_4$

| Element | Weight % | Atomic % |
|---------|----------|----------|
| C       | 3.0      | 7.6      |
| O       | 29.9     | 56.6     |
| Fe      | 49.6     | 26.8     |
| Ni      | 17.5     | 9.00     |

#### PVP- $ZnFe_2O_4$

| Element | Weight % | Atomic % |
|---------|----------|----------|
| C       | 3.6      | 9.00     |
| O       | 31.0     | 57.9     |
| Fe      | 44.3     | 23.5     |
| Zn      | 21.1     | 9.60     |

#### PVP- $MgFe_2O_4$

| Element | Weight % | Atomic % |
|---------|----------|----------|
| C       | 4.5      | 10.6     |
| O       | 27.7     | 49.0     |
| Fe      | 55.1     | 27.9     |
| Mg      | 10.7     | 12.5     |

#### PVP- $Sn_{0.5}Fe_{2.5}O_4$

| Element | Weight % | Atomic % |
|---------|----------|----------|
| C       | 3.9      | 11.3     |
| O       | 25.3     | 54.8     |
| Fe      | 40.2     | 25.0     |
| Sn      | 30.6     | 8.90     |
